# Supplementary material
Source: publisher figshare collection journal article supplement (https://karger.figshare.com/ndownloader/files/27061949)
Supplement: Supplementary file 1 [file 27061949]

Supplementary Table 4 Sensitive analysis of resection margin

| Study omitted | HR (95%CI) |
| --- | --- |
| Dong et al 2019 | 3.02 [1.59, 5.74] |
| Genç et al 2018 | 2.97 [1.42, 6.25] |
| Harimoto et al 2019 | 2.31 [1.42, 3.76] |
| Lopez-Aguiar 2019 | 3.00 [1.28, 7.01] |
| Pulvirenti et al 2019 | 2.13 [1.11, 4.10] |
| Zou et al 2020 | 2.63 [1.40, 4.92] |
| Combined | 2.62 [1.44, 4.76] |
